# Supplementary material for: R2R3-MYB Transcription Factor PlMYB108 Confers Drought Tolerance in Herbaceous Peony (Paeonia lactiflora Pall.)
Source: MDPI journal article supplement (doi:10.3390/ijms222111884), 2021-11-02
Supplement: s1 [file s1]

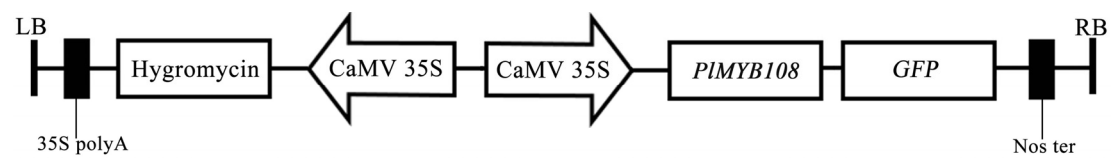

**Figure S1.** Overexpression of *PIMYB108* promoted by CaMV35s promoter for tobacco transformation.

**Table S1**

Gene-specific primers used for *PlMYB108* isolation.

| Primer                       | Sequence (5' - 3')            | Description                |
|------------------------------|-------------------------------|----------------------------|
| <i>PlMYB108</i> <sub>1</sub> | AACAACGGTGAAGGTCGC            | 1 <sup>st</sup> of 3' RACE |
| <i>PlMYB108</i> <sub>2</sub> | TTCAAGCCGCCTCTAATG            | 2 <sup>nd</sup> of 3' RACE |
| <i>PlMYB108</i> <sub>3</sub> | CGAGGTCAGATAGCGGAGAACTTGACTGG | 5' RACE (Clontech)         |

**Table S2**

Gene-specific primers used in gene expression analysis.

| Gene          | Species                   | GenBank accession | Forward primer sequence (5' - 3') | Reverse primer sequence (5' - 3') |
|---------------|---------------------------|-------------------|-----------------------------------|-----------------------------------|
| <i>Actin</i>  | <i>Paeonia lactiflora</i> | JN699053          | GTTGCCCTTGATTACGAG                | GCTTCCATTCCGATTAGTG               |
| <i>MYB108</i> | <i>Paeonia lactiflora</i> | -                 | AGAAGAAACTCCCGTGCTA               | GCGTTATTTATGGATGCC                |

**Table S3**

Gene-specific primers used for transformed tobacco line identification.

| Gene name                   | Gene ID  | Forward primer (5' - 3')                | Reverse primer (5' - 3')                | Application                    |
|-----------------------------|----------|-----------------------------------------|-----------------------------------------|--------------------------------|
| <i>NtActin</i>              | AB158612 | TCCTCATGCAATTCTTCG                      | ACCTGCCCCATCTGGTAAC                     | PCR and qRT-PCR identification |
| <i>PlMYB108<sub>4</sub></i> | -        | CAGTGGTCTCACAACATGGATGTT<br>AATGGGAGAGG | CAGTGGTCTCATACAAATATTGCT<br>GGAGAACTGTT | PCR identification             |
| <i>PlMYB108<sub>5</sub></i> | -        | AGAAGAAACTCCCGTGCTA                     | GCGTTATTTATGGATGCC                      | qRT-PCR identification         |
